# Supplementary material for: Environmental and Social Influences on the Behaviour of Free-Living Mandarin Ducks in Richmond Park
Source: MDPI journal article supplement (doi:10.3390/ani12192554), 2022-09-24
Supplement: s1 [file s1]

## Supplementary Information

Table S1: Averages + standard deviations of mandarin behaviour during different Social Periods

| Average % Time ( $\pm$ Standard Deviation) |             |                |                |                |                |                |               |
|--------------------------------------------|-------------|----------------|----------------|----------------|----------------|----------------|---------------|
| Social Period                              | Time of Day | Loafing        | Foraging       | Preening       | Swimming       | Vigilance      | Other         |
| Pre-Laying                                 | 08:30       | 39 $\pm$ 57.33 | 21 $\pm$ 31.64 | 5 $\pm$ 6.54   | 20 $\pm$ 20.59 | 7 $\pm$ 9.00   | 5 $\pm$ 13.70 |
|                                            | 09:00       | 35 $\pm$ 50.60 | 18 $\pm$ 29.75 | 8 $\pm$ 11.82  | 30 $\pm$ 23.19 | 5 $\pm$ 8.27   | 4 $\pm$ 10.97 |
|                                            | 09:30       | 30 $\pm$ 47.97 | 24 $\pm$ 32.62 | 12 $\pm$ 17.09 | 26 $\pm$ 23.92 | 5 $\pm$ 10.61  | 2 $\pm$ 5.57  |
|                                            | 10:00       | 26 $\pm$ 41.22 | 30 $\pm$ 34.11 | 5 $\pm$ 7.80   | 23 $\pm$ 19.26 | 8 $\pm$ 13.77  | 5 $\pm$ 13.41 |
|                                            | 13:00       | 33 $\pm$ 47.29 | 24 $\pm$ 35.23 | 10 $\pm$ 11.44 | 22 $\pm$ 17.01 | 5 $\pm$ 10.67  | 3 $\pm$ 8.49  |
|                                            | 13:30       | 28 $\pm$ 49.21 | 23 $\pm$ 29.12 | 20 $\pm$ 17.04 | 16 $\pm$ 15.28 | 4 $\pm$ 8.56   | 4 $\pm$ 9.01  |
|                                            | 14:00       | 16 $\pm$ 38.48 | 32 $\pm$ 38.92 | 14 $\pm$ 24.90 | 22 $\pm$ 18.43 | 9 $\pm$ 15.47  | 6 $\pm$ 12.03 |
|                                            | 14:30       | 30 $\pm$ 47.42 | 25 $\pm$ 40.19 | 17 $\pm$ 25.12 | 18 $\pm$ 19.80 | 7 $\pm$ 15.00  | 2 $\pm$ 4.77  |
|                                            | 16:00       | 37 $\pm$ 52.97 | 18 $\pm$ 30.67 | 18 $\pm$ 21.66 | 17 $\pm$ 20.43 | 9 $\pm$ 15.18  | 2 $\pm$ 5.88  |
|                                            | 16:30       | 40 $\pm$ 58.95 | 14 $\pm$ 25.15 | 23 $\pm$ 31.50 | 15 $\pm$ 18.94 | 5 $\pm$ 11.25  | 2 $\pm$ 7.24  |
|                                            | 17:00       | 15 $\pm$ 25.25 | 34 $\pm$ 42.16 | 8 $\pm$ 12.66  | 22 $\pm$ 15.18 | 9 $\pm$ 12.76  | 6 $\pm$ 17.41 |
|                                            | 17:30       | 26 $\pm$ 33.37 | 26 $\pm$ 35.55 | 17 $\pm$ 23.85 | 13 $\pm$ 13.62 | 7 $\pm$ 13.06  | 3 $\pm$ 8.28  |
| Laying                                     | 08:30       | 62 $\pm$ 37.42 | 6 $\pm$ 8.57   | 6 $\pm$ 5.99   | 19 $\pm$ 18.45 | 1 $\pm$ 1.65   | 0 $\pm$ 0.00  |
|                                            | 09:00       | 51 $\pm$ 61.06 | 15 $\pm$ 24.46 | 12 $\pm$ 6.56  | 16 $\pm$ 18.04 | 0 $\pm$ 1.38   | 2 $\pm$ 4.77  |
|                                            | 09:30       | 42 $\pm$ 57.29 | 6 $\pm$ 13.42  | 13 $\pm$ 17.61 | 35 $\pm$ 26.65 | 3 $\pm$ 6.92   | 0 $\pm$ 1.38  |
|                                            | 10:00       | 36 $\pm$ 55.27 | 17 $\pm$ 28.85 | 8 $\pm$ 12.29  | 29 $\pm$ 23.75 | 2 $\pm$ 3.20   | 2 $\pm$ 3.50  |
|                                            | 13:00       | 67 $\pm$ 63.49 | 8 $\pm$ 10.31  | 8 $\pm$ 8.14   | 15 $\pm$ 14.04 | 2 $\pm$ 3.32   | 2 $\pm$ 3.50  |
|                                            | 13:30       | 27 $\pm$ 35.64 | 19 $\pm$ 25.70 | 4 $\pm$ 4.37   | 37 $\pm$ 17.32 | 8 $\pm$ 7.45   | 3 $\pm$ 4.08  |
|                                            | 14:00       | 38 $\pm$ 64.17 | 9 $\pm$ 25.69  | 30 $\pm$ 37.25 | 10 $\pm$ 11.59 | 7 $\pm$ 18.03  | 1 $\pm$ 1.65  |
|                                            | 14:30       | 50 $\pm$ 46.51 | 6 $\pm$ 10.28  | 21 $\pm$ 20.95 | 6 $\pm$ 6.23   | 6 $\pm$ 8.63   | 1 $\pm$ 1.75  |
|                                            | 16:00       | 38 $\pm$ 16.50 | 17 $\pm$ 2.36  | 12 $\pm$ 9.43  | 22 $\pm$ 6.24  | 12 $\pm$ 2.36  | 0 $\pm$ 0.00  |
|                                            | 16:30       | 46 $\pm$ 45.94 | 9 $\pm$ 19.54  | 21 $\pm$ 16.29 | 14 $\pm$ 15.70 | 3 $\pm$ 4.96   | 0 $\pm$ 2.17  |
|                                            | 17:00       | 47 $\pm$ 37.14 | 3 $\pm$ 5.33   | 13 $\pm$ 13.33 | 21 $\pm$ 15.89 | 7 $\pm$ 6.71   | 1 $\pm$ 2.08  |
|                                            | 17:30       | 46 $\pm$ 48.52 | 7 $\pm$ 16.38  | 8 $\pm$ 8.66   | 14 $\pm$ 14.24 | 8 $\pm$ 6.58   | 4 $\pm$ 10.43 |
| Post-Incubation                            | 08:30       | 10 $\pm$ 29.36 | 27 $\pm$ 33.25 | 5 $\pm$ 3.40   | 20 $\pm$ 16.53 | 32 $\pm$ 27.34 | 2 $\pm$ 4.47  |
|                                            | 09:00       | 28 $\pm$ 38.02 | 16 $\pm$ 20.43 | 11 $\pm$ 12.44 | 19 $\pm$ 13.04 | 20 $\pm$ 21.79 | 3 $\pm$ 5.18  |
|                                            | 09:30       | 64 $\pm$ 72.91 | 9 $\pm$ 21.47  | 13 $\pm$ 15.31 | 8 $\pm$ 16.10  | 5 $\pm$ 13.05  | 1 $\pm$ 2.86  |
|                                            | 10:00       | 48 $\pm$ 72.95 | 4 $\pm$ 9.23   | 9 $\pm$ 14.67  | 20 $\pm$ 27.13 | 15 $\pm$ 23.52 | 2 $\pm$ 4.96  |
|                                            | 13:00       | 41 $\pm$ 61.53 | 14 $\pm$ 20.36 | 13 $\pm$ 24.83 | 14 $\pm$ 15.27 | 11 $\pm$ 17.02 | 1 $\pm$ 1.57  |
|                                            | 13:30       | 42 $\pm$ 61.03 | 15 $\pm$ 28.32 | 10 $\pm$ 16.11 | 16 $\pm$ 14.96 | 13 $\pm$ 24.68 | 0 $\pm$ 0.00  |
|                                            | 14:00       | 21 $\pm$ 29.11 | 24 $\pm$ 22.47 | 14 $\pm$ 13.88 | 18 $\pm$ 16.28 | 16 $\pm$ 19.82 | 2 $\pm$ 6.08  |
|                                            | 14:30       | 46 $\pm$ 70.05 | 13 $\pm$ 22.88 | 12 $\pm$ 13.27 | 11 $\pm$ 14.48 | 14 $\pm$ 20.79 | 1 $\pm$ 4.09  |
|                                            | 16:00       | 30 $\pm$ 50.57 | 15 $\pm$ 24.03 | 15 $\pm$ 17.04 | 24 $\pm$ 20.16 | 12 $\pm$ 14.09 | 2 $\pm$ 5.47  |
|                                            | 16:30       | 30 $\pm$ 55.96 | 6 $\pm$ 9.60   | 13 $\pm$ 14.44 | 24 $\pm$ 19.79 | 15 $\pm$ 17.46 | 1 $\pm$ 3.00  |
|                                            | 17:00       | 16 $\pm$ 26.06 | 27 $\pm$ 42.32 | 19 $\pm$ 17.81 | 16 $\pm$ 13.59 | 17 $\pm$ 25.21 | 4 $\pm$ 8.31  |
|                                            | 17:30       | 26 $\pm$ 55.78 | 23 $\pm$ 31.71 | 11 $\pm$ 18.25 | 19 $\pm$ 22.20 | 18 $\pm$ 19.77 | 2 $\pm$ 3.73  |
